# Supplementary material for: Tislelizumab Plus Chemotherapy vs Chemotherapy Alone as First-line Treatment for Advanced Squamous Non–Small-Cell Lung Cancer: A Phase 3 Randomized Clinical Trial
Source: PubMed Central journal article supplement — JAMA Oncol. 2021 Apr 1;7(5):709–17. doi: 10.1001/jamaoncol.2021.0366 (PMC8017481; doi:10.1001/jamaoncol.2021.0366), 2021-04-01
Supplement: jamaoncol-e210366-s001.pdf [file jamaoncol-e210366-s001.pdf]

## Supplemental Online Content

Wang J, Lu S, Yu X, et al. Tislelizumab plus chemotherapy vs chemotherapy alone as first-line treatment for advanced squamous non–small-cell lung cancer: a phase 3 randomized clinical trial. *JAMA Oncol*. Published online April 1, 2021. doi:10.1001/jamaoncol.2021.0366

**eMethods.** Criteria and end point definitions

**eFigure 1.** Study design

**eFigure 2.** Progression-free survival by investigator

**eFigure 3.** Progression-free survival by independent review committee in patients with  $\geq 50\%$  tumor cell PD-L1 expression

**eFigure 4.** Progression-free survival by independent review committee in patients with 1-49% tumor cell PD-L1 expression

**eFigure 5.** Progression-free survival by independent review committee in patients with  $< 1\%$  tumor cell PD-L1 expression

**eFigure 6.** Objective response rate by PD-L1 expression as assessed by independent review committee

**eFigure 7.** Potential immune-mediated AEs by preferred term occurring in  $> 2$  patients across treatment arms

**eTable 1.** Tislelizumab treatment exposure

**eTable 2.** Chemotherapy treatment exposure

**eTable 3.** Progression-free survival by disease stage per RECIST version 1.1 by independent review committee in ITT analysis set

**eTable 4.** Progression-free survival by PD-L1 per RECIST version 1.1 by independent review committee in ITT analysis set

**eTable 5.** Biomarker interaction analysis for PD-L1 at cutoff of 1% TC per RECIST version 1.1 by independent review committee in ITT analysis set

**eTable 6.** Overall summary of treatment emergent adverse events

**eTable 7.** Incidence of treatment-related adverse events occurring in  $\geq 15\%$  of patients

This supplemental material has been provided by the authors to give readers additional information about their work.

## **eMethods.**

### **Additional Inclusion/Exclusion Criteria**

#### **Inclusion Criteria:**

- Patients had not received prior systemic therapy for advanced or metastatic disease.
- Prior neoadjuvant/adjuvant therapy or chemoradiation therapy with curative intent was allowed if there had been a disease-free interval  $\geq 6$  months prior to randomization.

#### **Exclusion Criteria:**

- Patients had prior active malignancies  $\leq 2$  years from study entry or locally recurring cancers that underwent curative treatment, not including non-small cell lung cancer.
- Patients had prior treatment with inhibitors of EGFR, ALK, and/or PD-1/L1 inhibitors.

### **Endpoint Definitions**

- **Progression-free survival:** Defined as the time from randomization to the first objectively documented disease progression per RECIST v1.1 or death from any cause, whichever occurs first.
- **Overall survival:** Time from the date of randomization to the date of death from any cause.
- **Objective response rate:** Complete response (CR) plus partial response (PR) per RECIST v1.1 criteria.
- **Duration of response:** Time from the first occurrence of a documented objective response to documented disease progression per RECIST v1.1 criteria or death by any cause, whichever occurs first.
- **Disease control rate:** CR plus PR plus stable disease ( $\geq 6$  weeks).
- **Tumor Assessments and Screening for PD-L1 Expression**

Tumor assessments and radiographic imaging by MRI or CT were performed every 6 weeks during the first 6 months, every 9 weeks for the remainder of the first year, and every 12 weeks thereafter. Tumor cell PD-L1 membrane staining was assessed during screening with the VENTANA PD-L1 (SP263) assay at a central laboratory.

eFigure 1. Study design

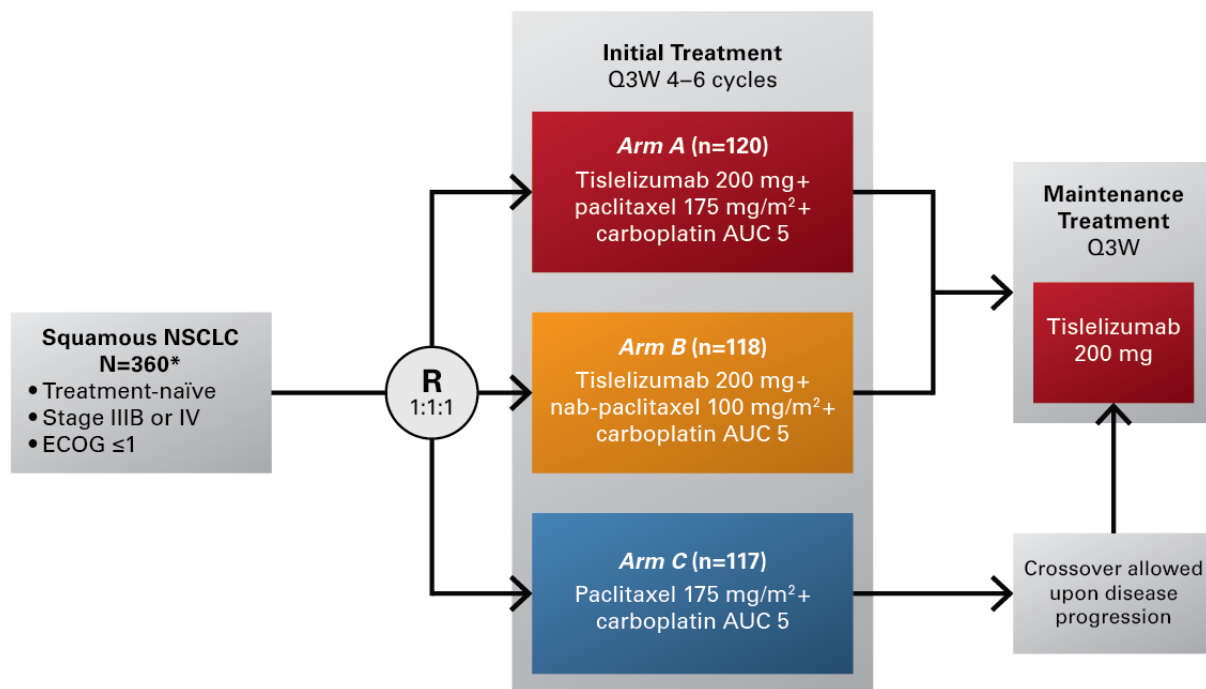

Target accrual was 342 patients, with 114 patients planned per arm.

\*A total of 360 patients were randomized; 5 patients (n=1 [B]; n=4 [C]) did not receive study treatment.

Tislelizumab, carboplatin, and paclitaxel were administered on D1.

Nab-paclitaxel was administered on D1, D8, and D15.

Abbreviations: D, day; ECOG, Eastern Cooperative Oncology Group; nab, nanoparticle albumin-bound; NSCLC, non-small cell lung cancer; Q3W, every 3 weeks; R, randomized.

eFigure 2. Progression-free survival by investigator

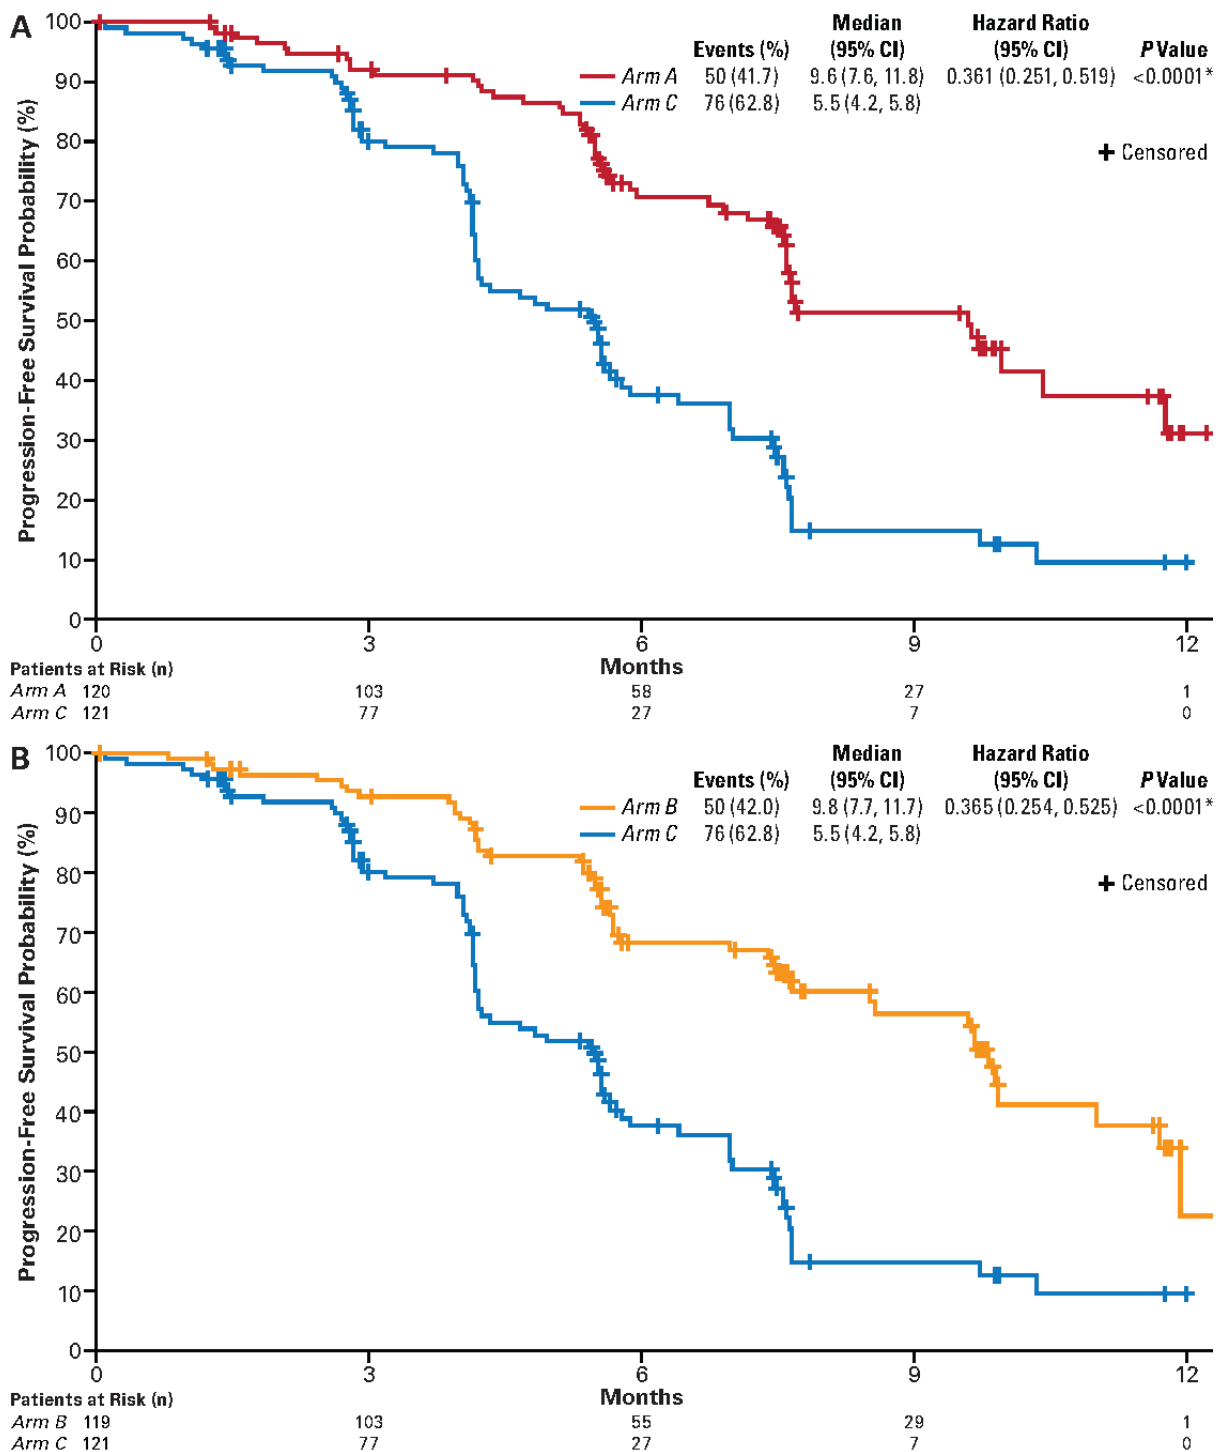

Arm A versus Arm C (A) and Arm B versus Arm C (B).

\*Descriptive P-value.

Abbreviation: CI, confidence interval.

eFigure 3. Progression-free survival by Independent Review Committee in patients with  $\geq 50\%$  tumor cell PD-L1 expression

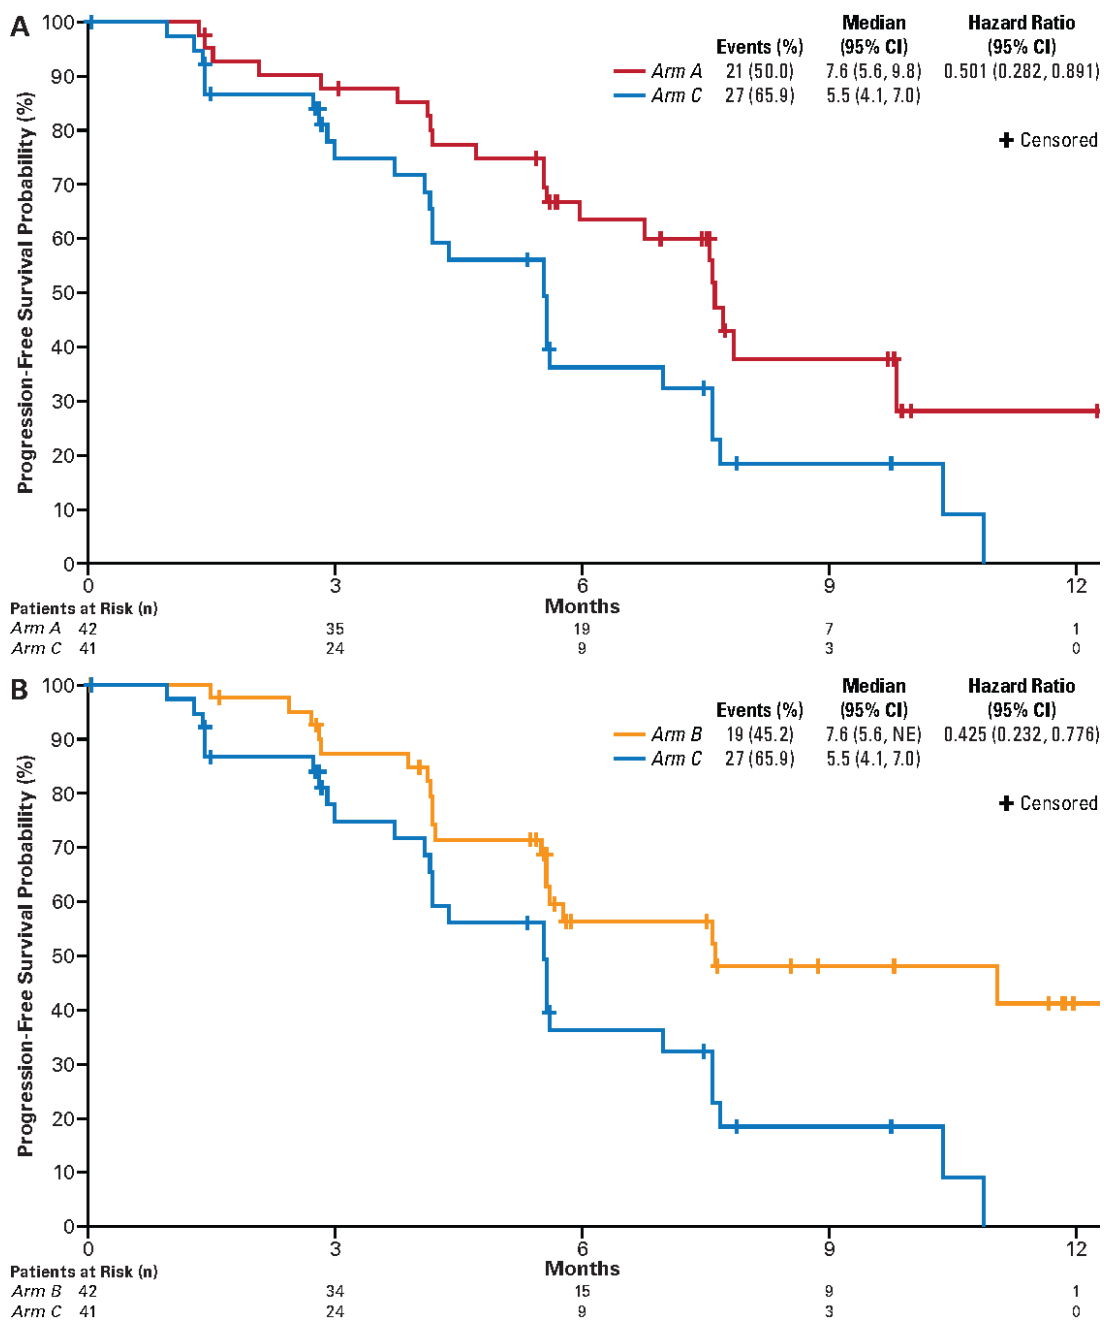

Arm A versus Arm C (A) and Arm B versus Arm C (B).

Abbreviations: CI, confidence interval; NE, not evaluable; PD-L1, programmed death-ligand 1.

eFigure 4. Progression-free survival by Independent Review Committee in patients with 1-49% tumor cell PD-L1 expression

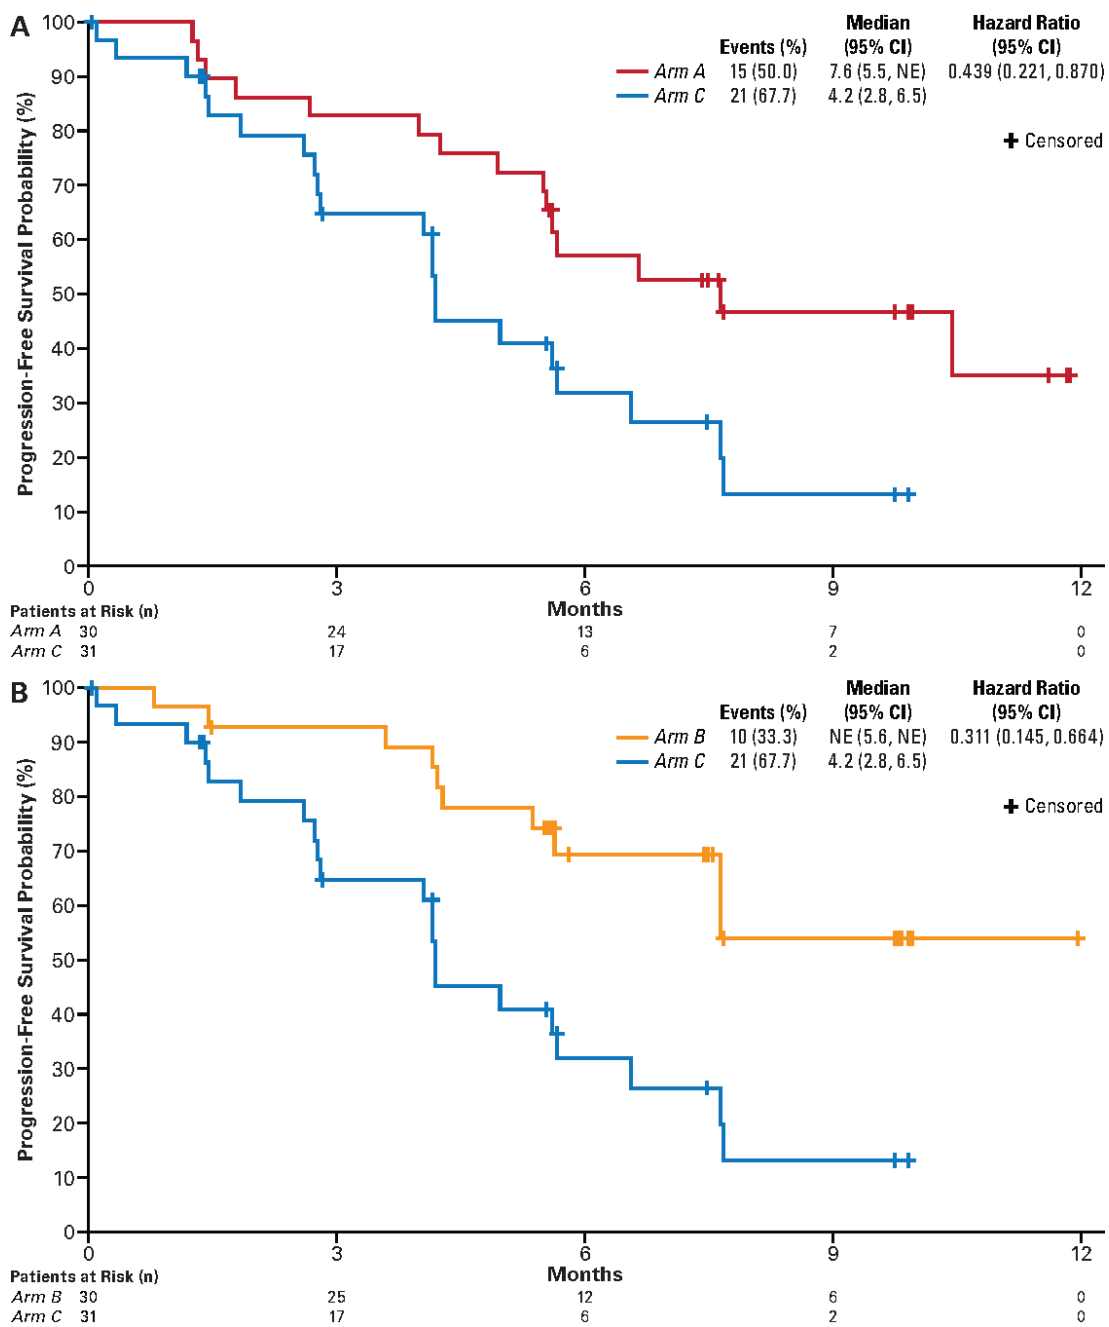

Arm A versus Arm C (A) and Arm B versus Arm C (B).

Abbreviations: CI, confidence interval; NE, not evaluable; PD-L1, programmed death-ligand 1.

eFigure 5. Progression-free survival by Independent Review Committee in patients with <1% tumor cell PD-L1 expression

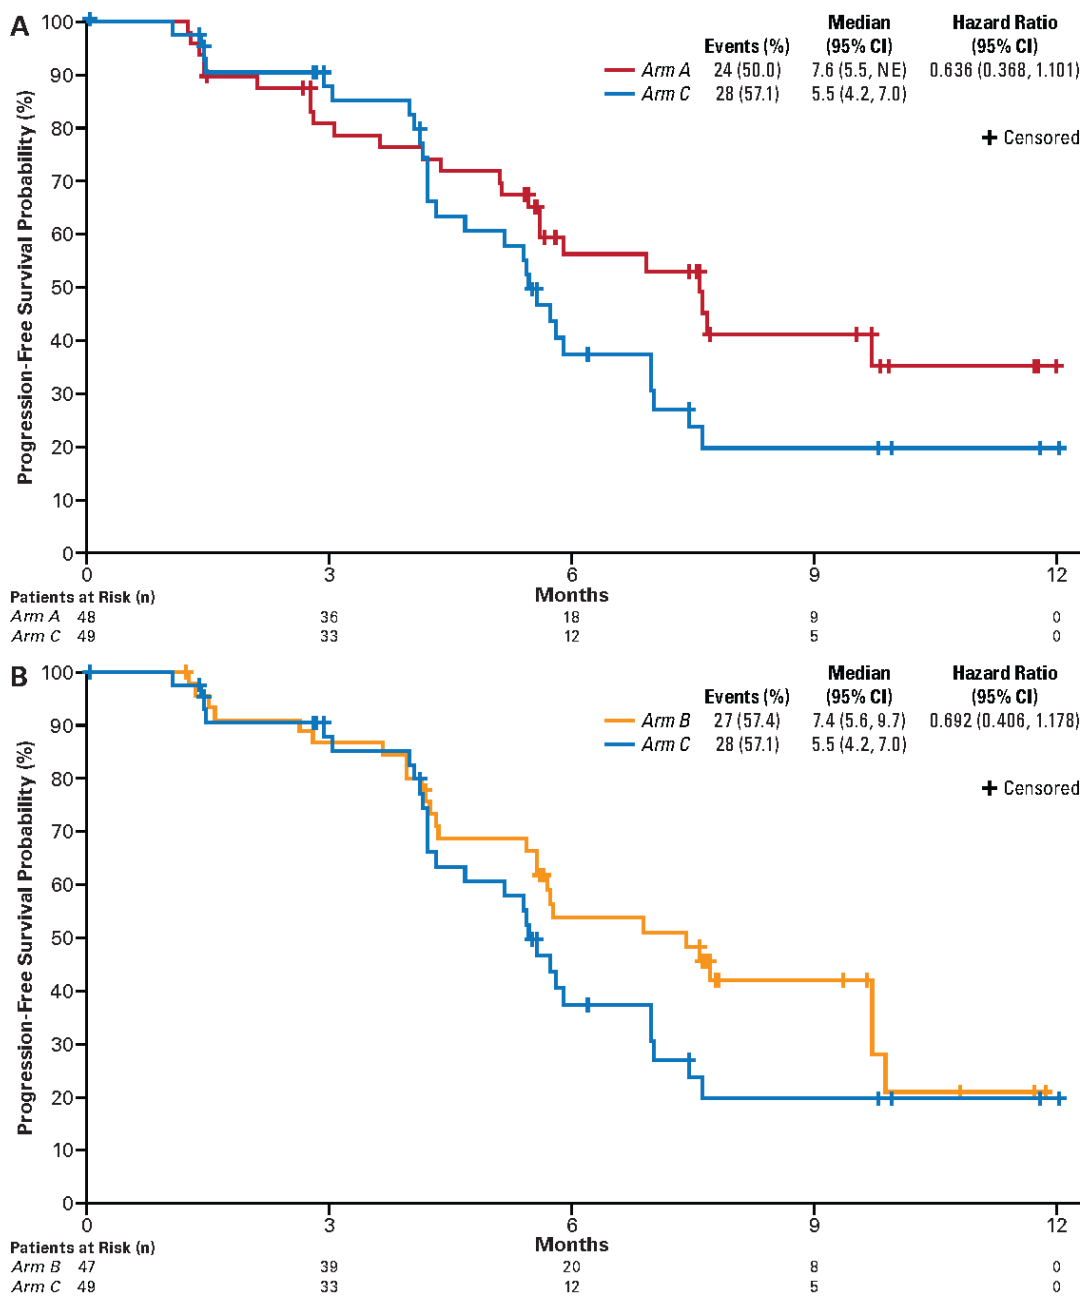

Arm A versus Arm C (A) and Arm B versus Arm C (B).

Abbreviations: CI, confidence interval; NE, not evaluable; PD-L1, programmed death-ligand 1.



eFigure 6. Objective response rate by PD-L1 expression as assessed by Independent Review Committee

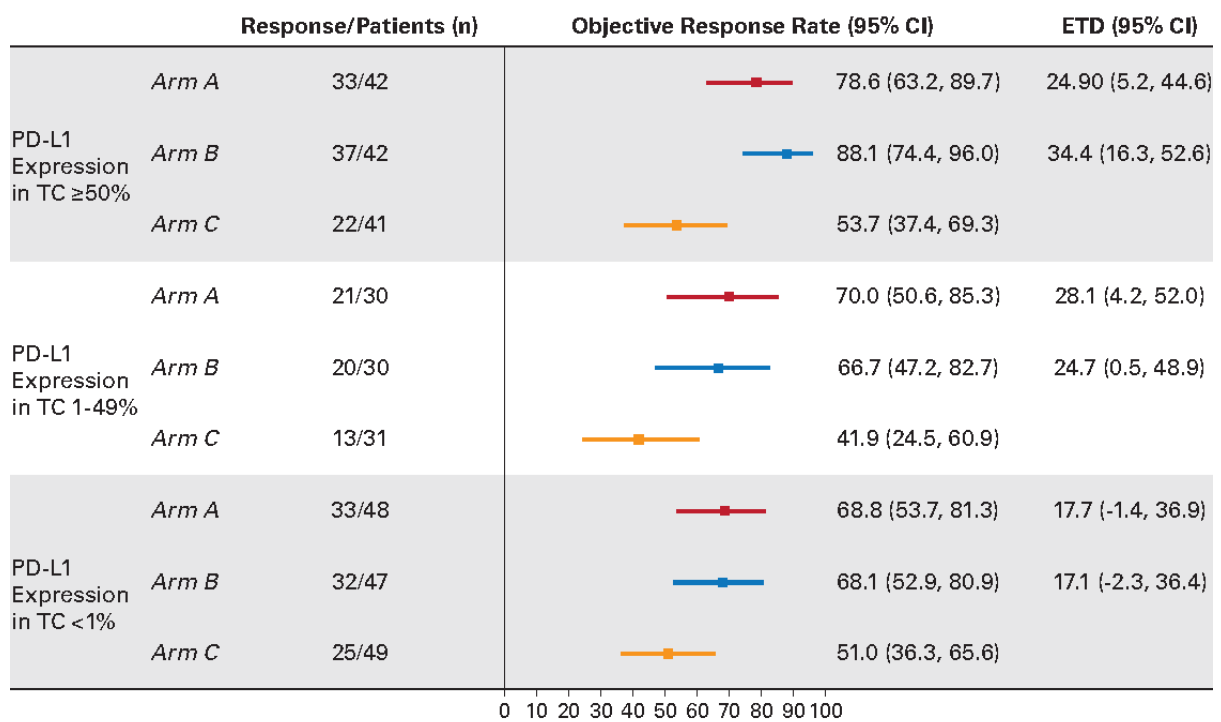

Abbreviations: CI, confidence interval; ETD, estimated treatment difference; PD-L1, programmed death-ligand 1; TC, tumor cell.

eFigure 7. Potential immune-mediated AEs by preferred term occurring in >2 patients across treatment arms

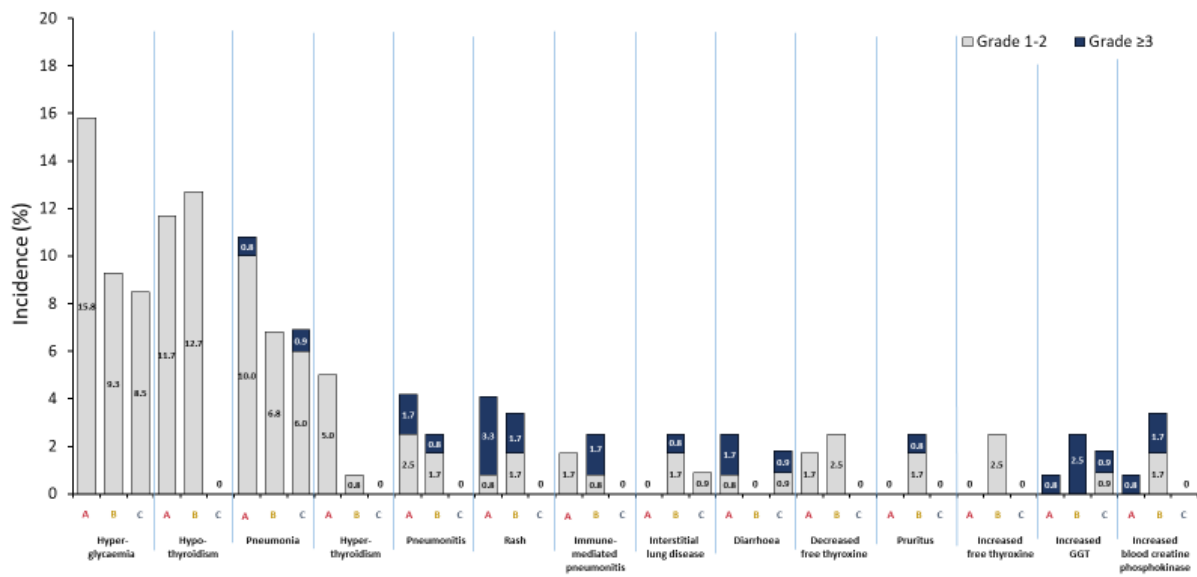

Potential immune-mediated AEs were selected from a group of preferred terms, regardless of whether the investigator attributed the event to a trial regimen or considered the event to be immune related.

Arm A: Tislelizumab + PC.

Arm B: Tislelizumab + nab-PC.

Arm C: PC alone.

Abbreviations: AEs, adverse events; GGT,  $\gamma$ -glutamyltransferase; nab, nanoparticle albumin-bound; PC, paclitaxel and carboplatin.

eTable 1. Tislelizumab Treatment Exposure

|                                                                                                                                                                                                                         | <i>Arm A</i><br>Tislelizumab +<br>Paclitaxel +<br>Carboplatin<br>(n=120) | <i>Arm B</i><br>Tislelizumab +<br>nab-Paclitaxel +<br>Carboplatin<br>(n=118) | <i>Arm C</i><br>Paclitaxel +<br>Carboplatin<br>(n=117) |
|-------------------------------------------------------------------------------------------------------------------------------------------------------------------------------------------------------------------------|--------------------------------------------------------------------------|------------------------------------------------------------------------------|--------------------------------------------------------|
| <b>Tislelizumab relative dose intensity<sup>a</sup></b>                                                                                                                                                                 |                                                                          |                                                                              |                                                        |
| Median (range)                                                                                                                                                                                                          | 97.7 (64-108)                                                            | 91.3 (55-100)                                                                | NA                                                     |
| <b>Number of cycles received with tislelizumab</b>                                                                                                                                                                      |                                                                          |                                                                              |                                                        |
| Median (range)                                                                                                                                                                                                          | 10 (1-20)                                                                | 10 (1-19)                                                                    | NA                                                     |
| 1-4 cycle, n (%)                                                                                                                                                                                                        | 23 (19.2)                                                                | 20 (16.9)                                                                    | NA                                                     |
| 5-8 cycles, n (%)                                                                                                                                                                                                       | 16 (13.3)                                                                | 26 (22.0)                                                                    | NA                                                     |
| 9-12 cycles, n (%)                                                                                                                                                                                                      | 49 (40.8)                                                                | 44 (37.3)                                                                    | NA                                                     |
| >12 cycles, n (%)                                                                                                                                                                                                       | 32 (26.7)                                                                | 28 (23.7)                                                                    | NA                                                     |
| <sup>a</sup> Relative dose intensity was defined as the ratio of the actual dose intensity (mg/cycle) and the planned dose intensity (mg/cycle).<br>Abbreviations: NA, not applicable; nab, nanoparticle albumin-bound. |                                                                          |                                                                              |                                                        |

eTable 2. Chemotherapy Treatment Exposure

|                                                                                                                                                                                                    | <b>Arm A</b><br>Tislelizumab +<br>Paclitaxel +<br>Carboplatin<br>(n=120) |                        | <b>Arm B</b><br>Tislelizumab +<br>nab-Paclitaxel +<br>Carboplatin<br>(n=118) |                        | <b>Arm C</b><br>Paclitaxel +<br>Carboplatin<br>(n=117) |                        |
|----------------------------------------------------------------------------------------------------------------------------------------------------------------------------------------------------|--------------------------------------------------------------------------|------------------------|------------------------------------------------------------------------------|------------------------|--------------------------------------------------------|------------------------|
|                                                                                                                                                                                                    | Paclitaxel                                                               | Carboplatin            | nab-<br>Paclitaxel                                                           | Carboplatin            | Paclitaxel                                             | Carboplatin            |
| <b>Relative dose intensity (%) per patient<sup>a</sup></b>                                                                                                                                         |                                                                          |                        |                                                                              |                        |                                                        |                        |
| Median (range)                                                                                                                                                                                     | 94.83<br>(62.2, 104.2)                                                   | 94.81<br>(63.5, 110.1) | 55.07<br>(23.3, 80.0)                                                        | 82.56<br>(47.0, 105.9) | 97.67<br>(62.1, 105.5)                                 | 96.68<br>(51.7, 123.0) |
| <b>Duration of exposure, weeks</b>                                                                                                                                                                 |                                                                          |                        |                                                                              |                        |                                                        |                        |
| Median (range)                                                                                                                                                                                     | 15.07<br>(3.0, 24.3)                                                     | 15.07<br>(3.0, 24.3)   | 14.00<br>(3.0, 24.9)                                                         | 14.00<br>(3.0, 24.9)   | 13.43<br>(0.3, 22.4)                                   | 13.43<br>(0.3, 26.1)   |
| <b>Number of cycles received</b>                                                                                                                                                                   |                                                                          |                        |                                                                              |                        |                                                        |                        |
| Median (range)                                                                                                                                                                                     | 4.5<br>(1, 6)                                                            | 4.5<br>(1, 6)          | 4.0<br>(1, 6)                                                                | 4.0<br>(1, 6)          | 4.0<br>(1, 6)                                          | 4.0<br>(1, 6)          |
| 1 cycle, n (%)                                                                                                                                                                                     | 7 (5.8)                                                                  | 7 (5.8)                | 9 (7.6)                                                                      | 9 (7.6)                | 7 (6.0)                                                | 7 (6.0)                |
| 2 cycles, n (%)                                                                                                                                                                                    | 10 (8.3)                                                                 | 9 (7.5)                | 5 (4.2)                                                                      | 5 (4.2)                | 7 (6.0)                                                | 7 (6.0)                |
| 3 cycles, n (%)                                                                                                                                                                                    | 4 (3.3)                                                                  | 4 (3.3)                | 18 (15.3)                                                                    | 18 (15.3)              | 8 (6.8)                                                | 8 (6.8)                |
| 4 cycles, n (%)                                                                                                                                                                                    | 39 (32.5)                                                                | 40 (33.3)              | 49 (41.5)                                                                    | 52 (44.1)              | 38 (32.5)                                              | 38 (32.5)              |
| >4 cycles, n (%)                                                                                                                                                                                   | 60 (50)                                                                  | 60 (50)                | 37 (31.4)                                                                    | 34 (28.8)              | 57 (48.7)                                              | 57 (48.7)              |
| <sup>a</sup> Relative dose intensity was defined as the ratio of the actual dose intensity (mg/cycle) and the planned dose intensity (mg/cycle).<br>Abbreviation: nab, nanoparticle albumin-bound. |                                                                          |                        |                                                                              |                        |                                                        |                        |

eTable 3. Progression-Free Survival by Disease Stage per RECIST version 1.1 by Independent Review Committee in ITT Analysis Set

|                                                                                                                                                                                                                                | Stage IIIB              | Stage IV                |
|--------------------------------------------------------------------------------------------------------------------------------------------------------------------------------------------------------------------------------|-------------------------|-------------------------|
| <b>Tislelizumab plus PC versus PC alone</b>                                                                                                                                                                                    |                         |                         |
| Median Tislelizumab plus PC (95% CI)                                                                                                                                                                                           | 9.8<br>(5.95, NE)       | 7.6<br>(5.59, 7.82)     |
| Median PFS PC alone (95% CI)                                                                                                                                                                                                   | 5.6<br>(4.17, 7.43)     | 5.2<br>(4.17, 5.59)     |
| PFS HR (95% CI)                                                                                                                                                                                                                | 0.402<br>(0.215, 0.750) | 0.570<br>(0.376, 0.862) |
| <b>Tislelizumab plus nab-PC versus PC alone</b>                                                                                                                                                                                |                         |                         |
| Median PFS Tislelizumab plus nab-PC (95% CI)                                                                                                                                                                                   | 11.0<br>(7.56, NE)      | 7.4<br>(5.59, 9.86)     |
| Median PFS PC alone (95% CI)                                                                                                                                                                                                   | 5.6<br>(4.17, 7.43)     | 5.2<br>(4.17, 5.59)     |
| PFS HR (95% CI)                                                                                                                                                                                                                | 0.372<br>(0.202, 0.686) | 0.537<br>(0.350, 0.824) |
| Abbreviations: CI, confidence interval; ITT, intent-to-treat; nab, nanoparticle albumin-bound; nab-PC, nab-paclitaxel plus carboplatin; PC, paclitaxel plus carboplatin; RECIST, Response Evaluation Criteria in Solid Tumors. |                         |                         |

eTable 4. Progression-Free Survival by PD-L1 Expression per RECIST version 1.1 by Independent Review Committee in ITT Analysis Set

|                                                                                                                                                                                                                                                                                  | PD-L1 <1%               | PD-L1 ≥1%               |
|----------------------------------------------------------------------------------------------------------------------------------------------------------------------------------------------------------------------------------------------------------------------------------|-------------------------|-------------------------|
| <b>Tislelizumab plus PC versus PC alone</b>                                                                                                                                                                                                                                      |                         |                         |
| Median PFS Tislelizumab plus PC (95% CI)                                                                                                                                                                                                                                         | 7.6<br>(5.45, NE)       | 7.6<br>(5.95, 10.41)    |
| Median PFS in PC alone (95% CI)                                                                                                                                                                                                                                                  | 5.5<br>(4.21, 6.97)     | 5.0<br>(4.14, 5.59)     |
| PFS HR (95% CI)                                                                                                                                                                                                                                                                  | 0.636<br>(0.368, 1.101) | 0.453<br>(0.293, 0.703) |
| <b>Tislelizumab plus nab-PC versus PC alone</b>                                                                                                                                                                                                                                  |                         |                         |
| Median PFS in Tislelizumab plus nab-PC (95% CI)                                                                                                                                                                                                                                  | 7.4<br>(5.55, 9.69)     | 11.0<br>(5.75, NE)      |
| Median PFS in PC alone (95% CI)                                                                                                                                                                                                                                                  | 5.5<br>(4.21, 6.97)     | 5.0<br>(4.14, 5.59)     |
| PFS HR (95% CI)                                                                                                                                                                                                                                                                  | 0.692<br>(0.406, 1.178) | 0.367<br>(0.229, 0.588) |
| Abbreviations: CI, confidence interval; HR, hazard ratio; ITT, intent-to-treat; nab, nanoparticle albumin-bound; nab-PC, nab-paclitaxel plus carboplatin; PC, paclitaxel plus carboplatin; PFS, progression-free survival; RECIST, Response Evaluation Criteria in Solid Tumors. |                         |                         |

eTable 5. Biomarker Interaction Analysis for PD-L1 at Cutoff of 1% TC per RECIST version 1.1 by Independent Review Committee in ITT Analysis Set

|                                                                                                                                                                                                                                                                                                                    | PD-L1 ≥1%               | PD-L1 <1%               | PD-L1 ≥1%:<br>PD-L1 <1%<br>Ratio | P-Value |
|--------------------------------------------------------------------------------------------------------------------------------------------------------------------------------------------------------------------------------------------------------------------------------------------------------------------|-------------------------|-------------------------|----------------------------------|---------|
| <b>Tislelizumab plus PC versus PC alone</b>                                                                                                                                                                                                                                                                        |                         |                         |                                  |         |
| Progression-free survival,<br>HR (95% CI)                                                                                                                                                                                                                                                                          | 0.449<br>(0.290, 0.695) | 0.621<br>(0.358, 1.075) | 0.723<br>(0.358, 1.458)          | 0.3651  |
| Objective response rate,<br>OR (95% CI)                                                                                                                                                                                                                                                                            | 3.372<br>(1.648, 6.901) | 2.196<br>(0.950, 5.073) | 1.536<br>(0.512, 4.605)          | 0.4438  |
| <b>Tislelizumab plus nab-PC versus PC alone</b>                                                                                                                                                                                                                                                                    |                         |                         |                                  |         |
| Progression-free survival,<br>HR (95% CI)                                                                                                                                                                                                                                                                          | 0.361<br>(0.227, 0.576) | 0.689<br>(0.404, 1.174) | 0.525<br>(0.258, 1.065)          | 0.0743  |
| Objective response rate,<br>OR (95% CI)                                                                                                                                                                                                                                                                            | 4.145<br>(1.980, 8.677) | 2.099<br>(0.910, 4.843) | 1.975<br>(0.649, 6.012)          | 0.231   |
| Abbreviations: CI, confidence interval; HR, hazard ratio; ITT, intent-to-treat; nab, nanoparticle albumin-bound; nab-PC, nab-paclitaxel plus carboplatin; OR, odds ratio; PC, paclitaxel plus carboplatin; PD-L1, programmed death-ligand 1; RECIST, Response Evaluation Criteria in Solid Tumors; TC, tumor cell. |                         |                         |                                  |         |

eTable 6. Overall Summary of Treatment-Emergent Adverse Events

|                                                                                                                                         | <i>Arm A</i><br>Tislelizumab +<br>Paclitaxel +<br>Carboplatin<br>(n=120) | <i>Arm B</i><br>Tislelizumab +<br>nab-Paclitaxel<br>Carboplatin<br>(n=118) | <i>Arm C</i><br>Paclitaxel +<br>Carboplatin<br>(n=117) |
|-----------------------------------------------------------------------------------------------------------------------------------------|--------------------------------------------------------------------------|----------------------------------------------------------------------------|--------------------------------------------------------|
| Patients with $\geq 1$ TEAE                                                                                                             | 120 (100.0)                                                              | 117 (99.2)                                                                 | 117 (100.0)                                            |
| Grade $\geq 3$ TEAE                                                                                                                     | 106 (88.3)                                                               | 102 (86.4)                                                                 | 98 (83.8)                                              |
| Serious TEAE                                                                                                                            | 44 (36.7)                                                                | 45 (38.1)                                                                  | 29 (24.8)                                              |
| TEAE leading to death                                                                                                                   | 4 (3.3)                                                                  | 5 (4.2)                                                                    | 5 (4.3)                                                |
| <b>TEAEs leading to discontinuation</b>                                                                                                 |                                                                          |                                                                            |                                                        |
| Any study treatment component                                                                                                           | 15 (12.5)                                                                | 35 (29.7)                                                                  | 18 (15.4)                                              |
| Tislelizumab                                                                                                                            | 12 (10.0)                                                                | 12 (10.1)                                                                  | NA                                                     |
| Paclitaxel                                                                                                                              | 9 (7.5)                                                                  | NA                                                                         | 17 (14.5)                                              |
| nab-paclitaxel                                                                                                                          | NA                                                                       | 28 (23.7)                                                                  | NA                                                     |
| Carboplatin                                                                                                                             | 9 (7.5)                                                                  | 27 (22.9)                                                                  | 17 (14.5)                                              |
| <b>TEAEs leading to dose modification or treatment delays</b>                                                                           |                                                                          |                                                                            |                                                        |
| Tislelizumab                                                                                                                            | 53 (44.2)                                                                | 93 (78.8)                                                                  | NA                                                     |
| Paclitaxel                                                                                                                              | 63 (52.5)                                                                | NA                                                                         | 47 (40.2)                                              |
| nab-paclitaxel                                                                                                                          | NA                                                                       | 108 (91.5)                                                                 | NA                                                     |
| Carboplatin                                                                                                                             | 63 (52.5)                                                                | 93 (78.7)                                                                  | 44 (37.6)                                              |
| Data presented as n (%).<br>Abbreviations: NA, not applicable; nab, nanoparticle albumin-bound; TEAE, treatment-emergent adverse event. |                                                                          |                                                                            |                                                        |



eTable 7. Incidence of Treatment-Related Adverse Events Occurring in ≥15% of Patients

| Preferred Term                        | <i>Arm A</i><br>Tislelizumab +<br>Paclitaxel +<br>Carboplatin<br>(n=120) |                    | <i>Arm B</i><br>Tislelizumab +<br>nab-Paclitaxel +<br>Carboplatin<br>(n=118) |                    | <i>Arm C</i><br>Paclitaxel +<br>Carboplatin<br>(n=117) |                    |
|---------------------------------------|--------------------------------------------------------------------------|--------------------|------------------------------------------------------------------------------|--------------------|--------------------------------------------------------|--------------------|
|                                       | All Grades,<br>n (%)                                                     | Grade ≥3,<br>n (%) | All Grades,<br>n (%)                                                         | Grade ≥3,<br>n (%) | All Grades,<br>n (%)                                   | Grade ≥3,<br>n (%) |
| <b>Patients with ≥1 TRAE</b>          | <b>119 (99.2)</b>                                                        | <b>103 (85.8)</b>  | <b>117 (99.2)</b>                                                            | <b>99 (83.9)</b>   | <b>117 (100.0)</b>                                     | <b>94 (80.3)</b>   |
| Anemia                                | 99 (82.5)                                                                | 6 (5.0)            | 104 (88.1)                                                                   | 24 (20.3)          | 87 (74.4)                                              | 11 (9.4)           |
| Alopecia                              | 77 (64.2)                                                                | 0                  | 81 (68.6)                                                                    | 0                  | 72 (61.5)                                              | 0                  |
| Decreased neutrophil count            | 75 (62.5)                                                                | 62 (51.7)          | 72 (61.0)                                                                    | 54 (45.8)          | 68 (58.1)                                              | 53 (45.3)          |
| Decreased white blood cell count      | 63 (52.5)                                                                | 26 (21.7)          | 68 (57.6)                                                                    | 32 (27.1)          | 62 (53.0)                                              | 28 (23.9)          |
| Leukopenia                            | 57 (47.5)                                                                | 19 (15.8)          | 66 (55.9)                                                                    | 30 (25.4)          | 56 (47.9)                                              | 21 (17.9)          |
| Neutropenia                           | 51 (42.5)                                                                | 40 (33.3)          | 50 (42.4)                                                                    | 32 (27.1)          | 55 (47.0)                                              | 47 (40.2)          |
| Decreased appetite                    | 50 (41.7)                                                                | 1 (0.8)            | 49 (41.5)                                                                    | 1 (0.8)            | 35 (29.9)                                              | 1 (0.9)            |
| Increased ALT                         | 48 (40.0)                                                                | 2 (1.7)            | 40 (33.9)                                                                    | 2 (1.7)            | 27 (23.1)                                              | 0                  |
| Decreased platelet count              | 40 (33.3)                                                                | 5 (4.2)            | 52 (44.1)                                                                    | 16 (13.6)          | 28 (23.9)                                              | 2 (1.7)            |
| Increased AST                         | 39 (32.5)                                                                | 0                  | 38 (32.2)                                                                    | 1 (0.8)            | 13 (11.1)                                              | 0                  |
| Nausea                                | 34 (28.3)                                                                | 0                  | 48 (40.7)                                                                    | 0                  | 29 (24.8)                                              | 1 (0.9)            |
| Thrombocytopenia                      | 33 (27.5)                                                                | 7 (5.8)            | 47 (39.8)                                                                    | 15 (12.7)          | 32 (27.4)                                              | 7 (6.0)            |
| Pain in extremity                     | 33 (27.5)                                                                | 3 (2.5)            | 8 (6.8)                                                                      | 0                  | 23 (19.7)                                              | 0                  |
| Increased blood bilirubin             | 27 (22.5)                                                                | 0                  | 14 (11.9)                                                                    | 0                  | 15 (12.8)                                              | 0                  |
| Asthenia                              | 26 (21.7)                                                                | 0                  | 19 (16.1)                                                                    | 0                  | 23 (19.7)                                              | 1 (0.9)            |
| Hypoesthesia                          | 25 (20.8)                                                                | 0                  | 11 (9.3)                                                                     | 0                  | 19 (16.2)                                              | 0                  |
| Vomiting                              | 24 (20.0)                                                                | 0                  | 22 (18.6)                                                                    | 0                  | 15 (12.8)                                              | 2 (1.7)            |
| Rash                                  | 23 (19.2)                                                                | 4 (3.3)            | 25 (21.2)                                                                    | 2 (1.7)            | 4 (3.4)                                                | 0                  |
| Constipation                          | 23 (19.2)                                                                | 0                  | 13 (11.0)                                                                    | 0                  | 18 (15.4)                                              | 0                  |
| Arthralgia                            | 22 (18.3)                                                                | 0                  | 16 (13.6)                                                                    | 0                  | 16 (13.7)                                              | 0                  |
| Increased blood lactate dehydrogenase | 18 (15.0)                                                                | 0                  | 15 (12.7)                                                                    | 0                  | 9 (7.7)                                                | 0                  |
| Malaise                               | 17 (14.2)                                                                | 1 (0.8)            | 19 (16.1)                                                                    | 0                  | 17 (14.5)                                              | 0                  |

Abbreviations: ALT, alanine aminotransferase; AST, aspartate aminotransferase; nab, nanoparticle albumin-bound; TRAE, treatment-related adverse event.
