# Supplementary material for: Tislelizumab Plus Chemotherapy vs Chemotherapy Alone as First-line Treatment for Advanced Squamous Non–Small-Cell Lung Cancer: A Phase 3 Randomized Clinical Trial
Source: PubMed Central journal article supplement — JAMA Oncol. 2021 Apr 1;7(5):709–17. doi: 10.1001/jamaoncol.2021.0366 (PMC8017481; doi:10.1001/jamaoncol.2021.0366), 2021-04-01
Supplement: jamaoncol-e210366-s003.pdf [file jamaoncol-e210366-s003.pdf]

## Data Sharing Statement

Wang. Tislelizumab Plus Chemotherapy vs Chemotherapy Alone as First-line Treatment for Advanced Squamous Non-Small-Cell Lung Cancer. *JAMA Oncol*. Published April 01, 2021.  
doi:10.1001/jamaoncol.2021.0366

### Data

**Data available:** No

### Additional Information

**Explanation for why data not available:** Upon request, and subject to certain criteria, conditions, and exceptions, BeiGene will provide access to individual de-identified participant data from BeiGene-sponsored global interventional clinical studies conducted for medicines (1) for indications that have been approved or (2) in programs that have been terminated. BeiGene will also consider requests for the protocol, data dictionary, and statistical analysis plan. Data requests may be submitted to [medicalinformation@beigene.com](mailto:medicalinformation@beigene.com).
